# Supplementary material for: Plasmacytoid dendritic cells and RNA-containing immune complexes drive expansion of peripheral B cell subsets with an SLE-like phenotype
Source: PubMed Central journal article supplement (PMC5573130; doi:10.1371/journal.pone.0183946), 2017-08-28
Supplement: pone.0183946.s005.pdf [file pone.0183946.s005.pdf]

## Supplementary Table S1

### nCounter Human Immunology V2 Panel Gene List

and the 20 additional genes included in the Custom CodeSet (nCounter, NanoString)

| <b>Official Symbol</b> | <b>Accession</b>               |
|------------------------|--------------------------------|
| ABCB1                  | <a href="#">NM_000927.3</a>    |
| ABL1                   | <a href="#">NM_005157.3</a>    |
| ADA                    | <a href="#">NM_000022.2</a>    |
| AHR                    | <a href="#">NM_001621.3</a>    |
| AICDA                  | <a href="#">NM_020661.1</a>    |
| AIRE                   | <a href="#">NM_000383.2</a>    |
| APP                    | <a href="#">NM_000484.3</a>    |
| ARG1                   | <a href="#">NM_000045.2</a>    |
| ARG2                   | <a href="#">NM_001172.3</a>    |
| ARHGDI1                | <a href="#">NM_001175.4</a>    |
| ATG10                  | <a href="#">NM_001131028.1</a> |
| ATG12                  | <a href="#">NM_004707.2</a>    |
| ATG16L1                | <a href="#">NM_198890.2</a>    |
| ATG5                   | <a href="#">NM_004849.2</a>    |
| ATG7                   | <a href="#">NM_001136031.2</a> |
| ATM                    | <a href="#">NM_000051.3</a>    |
| B2M                    | <a href="#">NM_004048.2</a>    |
| B3GAT1                 | <a href="#">NM_018644.3</a>    |
| BATF                   | <a href="#">NM_006399.3</a>    |
| BATF3                  | <a href="#">NM_018664.2</a>    |
| BAX                    | <a href="#">NM_138761.3</a>    |
| BCAP31                 | <a href="#">NM_005745.7</a>    |
| BCL10                  | <a href="#">NM_003921.2</a>    |
| BCL2                   | <a href="#">NM_000657.2</a>    |
| BCL2L11                | <a href="#">NM_138621.4</a>    |
| BCL3                   | <a href="#">NM_005178.2</a>    |
| BCL6                   | <a href="#">NM_001706.2</a>    |
| BID                    | <a href="#">NM_001196.2</a>    |
| BLNK                   | <a href="#">NM_013314.2</a>    |
| BST1                   | <a href="#">NM_004334.2</a>    |
| BST2                   | <a href="#">NM_004335.2</a>    |
| BTK                    | <a href="#">NM_000061.1</a>    |
| BTLA                   | <a href="#">NM_181780.2</a>    |
| C14orf166              | <a href="#">NM_016039.2</a>    |
| C1QA                   | <a href="#">NM_015991.2</a>    |
| C1QB                   | <a href="#">NM_000491.3</a>    |
| C1QBP                  | <a href="#">NM_001212.3</a>    |
| C1R                    | <a href="#">NM_001733.4</a>    |
| C1S                    | <a href="#">NM_001734.2</a>    |
| C2                     | <a href="#">NM_000063.3</a>    |
| C3                     | <a href="#">NM_000064.2</a>    |

|        |                                |
|--------|--------------------------------|
| C4A/B  | <a href="#">NM_007293.2</a>    |
| C4BPA  | <a href="#">NM_000715.3</a>    |
| C5     | <a href="#">NM_001735.2</a>    |
| C6     | <a href="#">NM_000065.2</a>    |
| C7     | <a href="#">NM_000587.2</a>    |
| C8A    | <a href="#">NM_000562.2</a>    |
| C8B    | <a href="#">NM_000066.2</a>    |
| C8G    | <a href="#">NM_000606.2</a>    |
| C9     | <a href="#">NM_001737.3</a>    |
| CAMP   | <a href="#">NM_004345.3</a>    |
| CARD9  | <a href="#">NM_052813.4</a>    |
| CASP1  | <a href="#">NM_001223.3</a>    |
| CASP10 | <a href="#">NM_032977.3</a>    |
| CASP2  | <a href="#">NM_032982.2</a>    |
| CASP3  | <a href="#">NM_032991.2</a>    |
| CASP8  | <a href="#">NM_001228.4</a>    |
| CCBP2  | <a href="#">NM_001296.3</a>    |
| CCL11  | <a href="#">NM_002986.2</a>    |
| CCL13  | <a href="#">NM_005408.2</a>    |
| CCL15  | <a href="#">NM_032965.3</a>    |
| CCL16  | <a href="#">NM_004590.2</a>    |
| CCL18  | <a href="#">NM_002988.2</a>    |
| CCL19  | <a href="#">NM_006274.2</a>    |
| CCL2   | <a href="#">NM_002982.3</a>    |
| CCL20  | <a href="#">NM_004591.1</a>    |
| CCL22  | <a href="#">NM_002990.3</a>    |
| CCL23  | <a href="#">NM_145898.1</a>    |
| CCL24  | <a href="#">NM_002991.2</a>    |
| CCL26  | <a href="#">NM_006072.4</a>    |
| CCL3   | <a href="#">NM_002983.2</a>    |
| CCL4   | <a href="#">NM_002984.2</a>    |
| CCL5   | <a href="#">NM_002985.2</a>    |
| CCL7   | <a href="#">NM_006273.2</a>    |
| CCL8   | <a href="#">NM_005623.2</a>    |
| CCND3  | <a href="#">NM_001760.2</a>    |
| CCR1   | <a href="#">NM_001295.2</a>    |
| CCR10  | <a href="#">NM_016602.2</a>    |
| CCR2   | <a href="#">NM_001123041.2</a> |
| CCR5   | <a href="#">NM_000579.1</a>    |
| CCR6   | <a href="#">NM_031409.2</a>    |
| CCR7   | <a href="#">NM_001838.2</a>    |
| CCR8   | <a href="#">NM_005201.2</a>    |
| CCRL1  | <a href="#">NM_016557.2</a>    |
| CCRL2  | <a href="#">NM_003965.4</a>    |
| CD14   | <a href="#">NM_000591.2</a>    |
| CD160  | <a href="#">NM_007053.2</a>    |

|        |                                |
|--------|--------------------------------|
| CD163  | <a href="#">NM_004244.4</a>    |
| CD164  | <a href="#">NM_006016.4</a>    |
| CD19   | <a href="#">NM_001770.4</a>    |
| CD1A   | <a href="#">NM_001763.2</a>    |
| CD1D   | <a href="#">NM_001766.3</a>    |
| CD2    | <a href="#">NM_001767.3</a>    |
| CD209  | <a href="#">NM_021155.2</a>    |
| CD22   | <a href="#">NM_001771.2</a>    |
| CD24   | <a href="#">NM_013230.2</a>    |
| CD244  | <a href="#">NM_016382.2</a>    |
| CD247  | <a href="#">NM_198053.1</a>    |
| CD27   | <a href="#">NM_001242.4</a>    |
| CD274  | <a href="#">NM_014143.3</a>    |
| CD276  | <a href="#">NM_001024736.1</a> |
| CD28   | <a href="#">NM_001243078.1</a> |
| CD34   | <a href="#">NM_001025109.1</a> |
| CD36   | <a href="#">NM_001001548.2</a> |
| CD3D   | <a href="#">NM_000732.4</a>    |
| CD3E   | <a href="#">NM_000733.2</a>    |
| CD3EAP | <a href="#">NM_012099.1</a>    |
| CD4    | <a href="#">NM_000616.4</a>    |
| CD40   | <a href="#">NM_001250.4</a>    |
| CD40LG | <a href="#">NM_000074.2</a>    |
| CD44   | <a href="#">NM_001001392.1</a> |
| CD46   | <a href="#">NM_172350.1</a>    |
| CD48   | <a href="#">NM_001778.2</a>    |
| CD5    | <a href="#">NM_014207.2</a>    |
| CD53   | <a href="#">NM_001040033.1</a> |
| CD55   | <a href="#">NM_000574.3</a>    |
| CD58   | <a href="#">NM_001779.2</a>    |
| CD59   | <a href="#">NM_000611.4</a>    |
| CD6    | <a href="#">NM_006725.3</a>    |
| CD7    | <a href="#">NM_006137.6</a>    |
| CD70   | <a href="#">NM_001252.2</a>    |
| CD74   | <a href="#">NM_001025159.1</a> |
| CD79A  | <a href="#">NM_001783.3</a>    |
| CD79B  | <a href="#">NM_021602.2</a>    |
| CD80   | <a href="#">NM_005191.3</a>    |
| CD81   | <a href="#">NM_004356.3</a>    |
| CD82   | <a href="#">NM_002231.3</a>    |
| CD83   | <a href="#">NM_004233.3</a>    |
| CD86   | <a href="#">NM_175862.3</a>    |
| CD8A   | <a href="#">NM_001768.5</a>    |
| CD8B   | <a href="#">NM_004931.3</a>    |
| CD9    | <a href="#">NM_001769.2</a>    |
| CD96   | <a href="#">NM_005816.4</a>    |

|                    |                                |
|--------------------|--------------------------------|
| CD97               | <a href="#">NM_078481.2</a>    |
| CD99               | <a href="#">NM_002414.3</a>    |
| CDH5               | <a href="#">NM_001795.3</a>    |
| CDKN1A             | <a href="#">NM_000389.2</a>    |
| CEACAM1            | <a href="#">NM_001712.3</a>    |
| CEACAM6            | <a href="#">NM_002483.4</a>    |
| CEACAM8            | <a href="#">NM_001816.3</a>    |
| CEBPB              | <a href="#">NM_005194.2</a>    |
| CFB                | <a href="#">NM_001710.5</a>    |
| CFD                | <a href="#">NM_001928.2</a>    |
| CFH                | <a href="#">NM_001014975.2</a> |
| CFI                | <a href="#">NM_000204.3</a>    |
| CFP                | <a href="#">NM_002621.2</a>    |
| CHUK               | <a href="#">NM_001278.3</a>    |
| CIITA              | <a href="#">NM_000246.3</a>    |
| CISH               | <a href="#">NM_145071.2</a>    |
| CLEC4A             | <a href="#">NM_194448.2</a>    |
| CLEC4E             | <a href="#">NM_014358.2</a>    |
| CLEC5A             | <a href="#">NM_013252.2</a>    |
| CLEC6A             | <a href="#">NM_001007033.1</a> |
| CLEC7A             | <a href="#">NM_197954.2</a>    |
| CLU                | <a href="#">NM_001831.2</a>    |
| CMKLR1             | <a href="#">NM_004072.1</a>    |
| CR1                | <a href="#">NM_000651.4</a>    |
| CR2                | <a href="#">NM_001006658.1</a> |
| CRADD              | <a href="#">NM_003805.3</a>    |
| CSF1               | <a href="#">NM_000757.4</a>    |
| CSF1R              | <a href="#">NM_005211.2</a>    |
| CSF2               | <a href="#">NM_000758.2</a>    |
| CSF2RB             | <a href="#">NM_000395.2</a>    |
| CSF3R              | <a href="#">NM_156038.2</a>    |
| CTLA4_all (commo   | <a href="#">NM_005214.3</a>    |
| CTLA4-TM (memb     | <a href="#">NM_005214.3</a>    |
| sCTLA4 (soluble fc | <a href="#">NM_001037631.1</a> |
| CTNNB1             | <a href="#">NM_001098210.1</a> |
| CTSC               | <a href="#">NM_001814.4</a>    |
| CTSG               | <a href="#">NM_001911.2</a>    |
| CTSS               | <a href="#">NM_004079.3</a>    |
| CUL9               | <a href="#">NM_015089.2</a>    |
| CX3CL1             | <a href="#">NM_002996.3</a>    |
| CX3CR1             | <a href="#">NM_001337.3</a>    |
| CXCL1              | <a href="#">NM_001511.1</a>    |
| CXCL10             | <a href="#">NM_001565.1</a>    |
| CXCL11             | <a href="#">NM_005409.4</a>    |
| CXCL12             | <a href="#">NM_000609.5</a>    |
| CXCL13             | <a href="#">NM_006419.2</a>    |

|          |                                |
|----------|--------------------------------|
| CXCL2    | <a href="#">NM_002089.3</a>    |
| CXCL9    | <a href="#">NM_002416.1</a>    |
| CXCR1    | <a href="#">NM_000634.2</a>    |
| CXCR2    | <a href="#">NM_001557.2</a>    |
| CXCR3    | <a href="#">NM_001504.1</a>    |
| CXCR4    | <a href="#">NM_003467.2</a>    |
| CXCR6    | <a href="#">NM_006564.1</a>    |
| CYBB     | <a href="#">NM_000397.3</a>    |
| DEFB1    | <a href="#">NM_005218.3</a>    |
| DEFB103A | <a href="#">NM_001081551.2</a> |
| DEFB103B | <a href="#">NM_018661.3</a>    |
| DEFB4A   | <a href="#">NM_004942.2</a>    |
| DPP4     | <a href="#">NM_001935.3</a>    |
| DUSP4    | <a href="#">NM_057158.2</a>    |
| EBI3     | <a href="#">NM_005755.2</a>    |
| EDNRB    | <a href="#">NM_003991.2</a>    |
| EGR1     | <a href="#">NM_001964.2</a>    |
| EGR2     | <a href="#">NM_000399.3</a>    |
| ENTPD1   | <a href="#">NM_001098175.1</a> |
| EOMES    | <a href="#">NM_005442.2</a>    |
| ETS1     | <a href="#">NM_005238.3</a>    |
| FADD     | <a href="#">NM_003824.2</a>    |
| FAS      | <a href="#">NM_000043.3</a>    |
| FCAR     | <a href="#">NM_133280.1</a>    |
| FCER1A   | <a href="#">NM_002001.2</a>    |
| FCER1G   | <a href="#">NM_004106.1</a>    |
| FCGR1A/B | <a href="#">NM_000566.3</a>    |
| FCGR2A   | <a href="#">NM_021642.3</a>    |
| FCGR2A/C | <a href="#">NM_201563.4</a>    |
| FCGR2B   | <a href="#">NM_001002273.1</a> |
| FCGR3A/B | <a href="#">NM_000570.4</a>    |
| FCGRT    | <a href="#">NM_004107.4</a>    |
| FKBP5    | <a href="#">NM_001145775.1</a> |
| FN1      | <a href="#">NM_212482.1</a>    |
| FOXP3    | <a href="#">NM_014009.3</a>    |
| FYN      | <a href="#">NM_002037.3</a>    |
| GATA3    | <a href="#">NM_001002295.1</a> |
| GBP1     | <a href="#">NM_002053.1</a>    |
| GBP5     | <a href="#">NM_052942.3</a>    |
| GFI1     | <a href="#">NM_005263.2</a>    |
| GNLY     | <a href="#">NM_006433.2</a>    |
| GP1BB    | <a href="#">NM_000407.4</a>    |
| GPI      | <a href="#">NM_000175.2</a>    |
| GPR183   | <a href="#">NM_004951.3</a>    |
| GZMA     | <a href="#">NM_006144.2</a>    |
| GZMB     | <a href="#">NM_004131.3</a>    |

|          |                                |
|----------|--------------------------------|
| GZMK     | <a href="#">NM_002104.2</a>    |
| HAMP     | <a href="#">NM_021175.2</a>    |
| HAVCR2   | <a href="#">NM_032782.3</a>    |
| HFE      | <a href="#">NM_139011.2</a>    |
| HLA-A    | <a href="#">NM_002116.5</a>    |
| HLA-B    | <a href="#">NM_005514.6</a>    |
| HLA-C    | <a href="#">NM_002117.4</a>    |
| HLA-DMA  | <a href="#">NM_006120.3</a>    |
| HLA-DMB  | <a href="#">NM_002118.3</a>    |
| HLA-DOB  | <a href="#">NM_002120.3</a>    |
| HLA-DPA1 | <a href="#">NM_033554.2</a>    |
| HLA-DPB1 | <a href="#">NM_002121.4</a>    |
| HLA-DQA1 | <a href="#">NM_002122.3</a>    |
| HLA-DQB1 | <a href="#">NM_002123.3</a>    |
| HLA-DRA  | <a href="#">NM_019111.3</a>    |
| HLA-DRB1 | <a href="#">NM_002124.2</a>    |
| HLA-DRB3 | <a href="#">NM_022555.3</a>    |
| HRAS     | <a href="#">NM_005343.2</a>    |
| ICAM1    | <a href="#">NM_000201.2</a>    |
| ICAM2    | <a href="#">NM_000873.3</a>    |
| ICAM3    | <a href="#">NM_002162.3</a>    |
| ICAM4    | <a href="#">NM_001039132.1</a> |
| ICAM5    | <a href="#">NM_003259.3</a>    |
| ICOS     | <a href="#">NM_012092.2</a>    |
| ICOSLG   | <a href="#">NM_015259.4</a>    |
| IDO1     | <a href="#">NM_002164.3</a>    |
| IFI16    | <a href="#">NM_005531.1</a>    |
| IFI35    | <a href="#">NM_005533.3</a>    |
| IFIH1    | <a href="#">NM_022168.2</a>    |
| IFIT2    | <a href="#">NM_001547.4</a>    |
| IFITM1   | <a href="#">NM_003641.3</a>    |
| IFNA1/13 | <a href="#">NM_024013.1</a>    |
| IFNA2    | <a href="#">NM_000605.3</a>    |
| IFNAR1   | <a href="#">NM_000629.2</a>    |
| IFNAR2   | <a href="#">NM_000874.3</a>    |
| IFNB1    | <a href="#">NM_002176.2</a>    |
| IFNG     | <a href="#">NM_000619.2</a>    |
| IFNGR1   | <a href="#">NM_000416.1</a>    |
| IGF2R    | <a href="#">NM_000876.1</a>    |
| IKBKAP   | <a href="#">NM_003640.3</a>    |
| IKBKB    | <a href="#">NM_001556.1</a>    |
| IKBKE    | <a href="#">NM_014002.2</a>    |
| IKBKG    | <a href="#">NM_003639.2</a>    |
| IKZF1    | <a href="#">NM_006060.3</a>    |
| IKZF2    | <a href="#">NM_016260.2</a>    |
| IKZF3    | <a href="#">NM_183232.2</a>    |

|         |                                |
|---------|--------------------------------|
| IL10    | <a href="#">NM_000572.2</a>    |
| IL10RA  | <a href="#">NM_001558.2</a>    |
| IL11RA  | <a href="#">NM_147162.1</a>    |
| IL12A   | <a href="#">NM_000882.2</a>    |
| IL12B   | <a href="#">NM_002187.2</a>    |
| IL12RB1 | <a href="#">NM_005535.1</a>    |
| IL13    | <a href="#">NM_002188.2</a>    |
| IL13RA1 | <a href="#">NM_001560.2</a>    |
| IL15    | <a href="#">NM_172174.1</a>    |
| IL16    | <a href="#">NM_004513.4</a>    |
| IL17A   | <a href="#">NM_002190.2</a>    |
| IL17B   | <a href="#">NM_014443.2</a>    |
| IL17F   | <a href="#">NM_052872.3</a>    |
| IL18    | <a href="#">NM_001562.2</a>    |
| IL18R1  | <a href="#">NM_003855.2</a>    |
| IL18RAP | <a href="#">NM_003853.2</a>    |
| IL19    | <a href="#">NM_013371.3</a>    |
| IL1A    | <a href="#">NM_000575.3</a>    |
| IL1B    | <a href="#">NM_000576.2</a>    |
| IL1R1   | <a href="#">NM_000877.2</a>    |
| IL1R2   | <a href="#">NM_173343.1</a>    |
| IL1RAP  | <a href="#">NM_002182.2</a>    |
| IL1RL1  | <a href="#">NM_016232.4</a>    |
| IL1RL2  | <a href="#">NM_003854.2</a>    |
| IL1RN   | <a href="#">NM_000577.3</a>    |
| IL2     | <a href="#">NM_000586.2</a>    |
| IL20    | <a href="#">NM_018724.3</a>    |
| IL21    | <a href="#">NM_021803.2</a>    |
| IL21R   | <a href="#">NM_021798.2</a>    |
| IL22    | <a href="#">NM_020525.4</a>    |
| IL22RA2 | <a href="#">NM_181310.1</a>    |
| IL23A   | <a href="#">NM_016584.2</a>    |
| IL23R   | <a href="#">NM_144701.2</a>    |
| IL26    | <a href="#">NM_018402.1</a>    |
| IL27    | <a href="#">NM_145659.3</a>    |
| IL28A   | <a href="#">NM_172138.1</a>    |
| IL28A/B | <a href="#">NM_172139.2</a>    |
| IL29    | <a href="#">NM_172140.1</a>    |
| IL2RA   | <a href="#">NM_000417.1</a>    |
| IL2RB   | <a href="#">NM_000878.2</a>    |
| IL2RG   | <a href="#">NM_000206.1</a>    |
| IL3     | <a href="#">NM_000588.3</a>    |
| IL32    | <a href="#">NM_001012633.1</a> |
| IL4     | <a href="#">NM_000589.2</a>    |
| IL4R    | <a href="#">NM_000418.2</a>    |
| IL5     | <a href="#">NM_000879.2</a>    |

|                   |                                |
|-------------------|--------------------------------|
| IL6               | <a href="#">NM_000600.1</a>    |
| IL6R              | <a href="#">NM_000565.2</a>    |
| IL6ST             | <a href="#">NM_002184.2</a>    |
| IL7               | <a href="#">NM_000880.2</a>    |
| IL7R              | <a href="#">NM_002185.2</a>    |
| IL8               | <a href="#">NM_000584.2</a>    |
| IL9               | <a href="#">NM_000590.1</a>    |
| ILF3              | <a href="#">NM_001137673.1</a> |
| IRAK1             | <a href="#">NM_001569.3</a>    |
| IRAK2             | <a href="#">NM_001570.3</a>    |
| IRAK3             | <a href="#">NM_007199.1</a>    |
| IRAK4             | <a href="#">NM_016123.1</a>    |
| IRF1              | <a href="#">NM_002198.1</a>    |
| IRF3              | <a href="#">NM_001571.5</a>    |
| IRF4              | <a href="#">NM_002460.1</a>    |
| IRF5              | <a href="#">NM_002200.3</a>    |
| IRF7              | <a href="#">NM_001572.3</a>    |
| IRF8              | <a href="#">NM_002163.2</a>    |
| IRGM              | <a href="#">NM_001145805.1</a> |
| ITGA2B            | <a href="#">NM_000419.3</a>    |
| ITGA4             | <a href="#">NM_000885.4</a>    |
| ITGA5             | <a href="#">NM_002205.2</a>    |
| ITGA6             | <a href="#">NM_000210.1</a>    |
| ITGAE             | <a href="#">NM_002208.4</a>    |
| ITGAL             | <a href="#">NM_002209.2</a>    |
| ITGAM             | <a href="#">NM_000632.3</a>    |
| ITGAX             | <a href="#">NM_000887.3</a>    |
| ITGB1             | <a href="#">NM_033666.2</a>    |
| ITGB2             | <a href="#">NM_000211.2</a>    |
| ITLN1             | <a href="#">NM_017625.2</a>    |
| ITLN2             | <a href="#">NM_080878.2</a>    |
| JAK1              | <a href="#">NM_002227.1</a>    |
| JAK2              | <a href="#">NM_004972.2</a>    |
| JAK3              | <a href="#">NM_000215.2</a>    |
| KCNJ2             | <a href="#">NM_000891.2</a>    |
| KIR_Activating_Su | <a href="#">NM_001083539.1</a> |
| KIR_Activating_Su | <a href="#">NM_014512.1</a>    |
| KIR_Inhibiting_Su | <a href="#">NM_014218.2</a>    |
| KIR_Inhibiting_Su | <a href="#">NM_014511.3</a>    |
| KIR3DL1           | <a href="#">NM_013289.2</a>    |
| KIR3DL2           | <a href="#">NM_006737.2</a>    |
| KIR3DL3           | <a href="#">NM_153443.3</a>    |
| KIT               | <a href="#">NM_000222.2</a>    |
| KLRAP1            | <a href="#">NR_028045.1</a>    |
| KLRB1             | <a href="#">NM_002258.2</a>    |
| KLRC1             | <a href="#">NM_002259.3</a>    |



|          |                                |
|----------|--------------------------------|
| KLRC2    | <a href="#">NM_002260.3</a>    |
| KLRC3    | <a href="#">NM_007333.2</a>    |
| KLRC4    | <a href="#">NM_013431.2</a>    |
| KLRD1    | <a href="#">NM_002262.3</a>    |
| KLRF1    | <a href="#">NM_016523.1</a>    |
| KLRF2    | <a href="#">NM_001190765.1</a> |
| KLRG1    | <a href="#">NM_005810.3</a>    |
| KLRG2    | <a href="#">NM_198508.2</a>    |
| KLRK1    | <a href="#">NM_007360.1</a>    |
| LAG3     | <a href="#">NM_002286.5</a>    |
| LAIR1    | <a href="#">NM_002287.3</a>    |
| LAMP3    | <a href="#">NM_014398.3</a>    |
| LCK      | <a href="#">NM_005356.2</a>    |
| LCP2     | <a href="#">NM_005565.3</a>    |
| LEF1     | <a href="#">NM_016269.3</a>    |
| LGALS3   | <a href="#">NM_001177388.1</a> |
| LIF      | <a href="#">NM_002309.3</a>    |
| LILRA1   | <a href="#">NM_006863.1</a>    |
| LILRA2   | <a href="#">NM_006866.2</a>    |
| LILRA3   | <a href="#">NM_006865.3</a>    |
| LILRA4   | <a href="#">NM_012276.3</a>    |
| LILRA5   | <a href="#">NM_181879.2</a>    |
| LILRA6   | <a href="#">NM_024318.2</a>    |
| LILRB1   | <a href="#">NM_001081637.1</a> |
| LILRB2   | <a href="#">NM_005874.1</a>    |
| LILRB3   | <a href="#">NM_006864.2</a>    |
| LILRB4   | <a href="#">NM_001081438.1</a> |
| LILRB5   | <a href="#">NM_001081442.1</a> |
| LITAF    | <a href="#">NM_004862.3</a>    |
| LTA      | <a href="#">NM_000595.2</a>    |
| LTB4R    | <a href="#">NM_181657.3</a>    |
| LTB4R2   | <a href="#">NM_019839.4</a>    |
| LTBR     | <a href="#">NM_002342.1</a>    |
| LTF      | <a href="#">NM_002343.2</a>    |
| LY96     | <a href="#">NM_015364.2</a>    |
| MAF      | <a href="#">NM_005360.4</a>    |
| MALT1    | <a href="#">NM_006785.2</a>    |
| MAP4K1   | <a href="#">NM_007181.3</a>    |
| MAP4K2   | <a href="#">NM_004579.2</a>    |
| MAP4K4   | <a href="#">NM_004834.3</a>    |
| MAPK1    | <a href="#">NM_138957.2</a>    |
| MAPK11   | <a href="#">NM_002751.5</a>    |
| MAPK14   | <a href="#">NM_001315.1</a>    |
| MAPKAPK2 | <a href="#">NM_004759.3</a>    |
| MARCO    | <a href="#">NM_006770.3</a>    |
| MASP1    | <a href="#">NM_139125.3</a>    |

|          |                                |
|----------|--------------------------------|
| MASP2    | <a href="#">NM_139208.1</a>    |
| MBL2     | <a href="#">NM_000242.2</a>    |
| MBP      | <a href="#">NM_002385.2</a>    |
| MCL1     | <a href="#">NM_021960.3</a>    |
| MIF      | <a href="#">NM_002415.1</a>    |
| MME      | <a href="#">NM_000902.2</a>    |
| MR1      | <a href="#">NM_001531.2</a>    |
| MRC1     | <a href="#">NM_002438.2</a>    |
| MS4A1    | <a href="#">NM_152866.2</a>    |
| MSR1     | <a href="#">NM_002445.3</a>    |
| MUC1     | <a href="#">NM_001018017.1</a> |
| MX1      | <a href="#">NM_002462.2</a>    |
| MYD88    | <a href="#">NM_002468.3</a>    |
| NCAM1    | <a href="#">NM_000615.5</a>    |
| NCF4     | <a href="#">NM_000631.4</a>    |
| NCR1     | <a href="#">NM_004829.5</a>    |
| NFATC1   | <a href="#">NM_172389.1</a>    |
| NFATC2   | <a href="#">NM_012340.3</a>    |
| NFATC3   | <a href="#">NM_004555.2</a>    |
| NFIL3    | <a href="#">NM_005384.2</a>    |
| NFKB1    | <a href="#">NM_003998.2</a>    |
| NFKB2    | <a href="#">NM_002502.2</a>    |
| NFKBIA   | <a href="#">NM_020529.1</a>    |
| NFKBIZ   | <a href="#">NM_001005474.1</a> |
| NLRP3    | <a href="#">NM_001079821.2</a> |
| NOD1     | <a href="#">NM_006092.1</a>    |
| NOD2     | <a href="#">NM_022162.1</a>    |
| NOS2     | <a href="#">NM_000625.4</a>    |
| NOTCH1   | <a href="#">NM_017617.3</a>    |
| NOTCH2   | <a href="#">NM_024408.3</a>    |
| NT5E     | <a href="#">NM_002526.2</a>    |
| PAX5     | <a href="#">NM_016734.1</a>    |
| PDCD1    | <a href="#">NM_005018.1</a>    |
| PDCD1LG2 | <a href="#">NM_025239.3</a>    |
| PDCD2    | <a href="#">NM_144781.2</a>    |
| PDGFB    | <a href="#">NM_033016.2</a>    |
| PDGFRB   | <a href="#">NM_002609.3</a>    |
| PECAM1   | <a href="#">NM_000442.3</a>    |
| PIGR     | <a href="#">NM_002644.2</a>    |
| PLA2G2A  | <a href="#">NM_000300.2</a>    |
| PLA2G2E  | <a href="#">NM_014589.1</a>    |
| PLAU     | <a href="#">NM_002658.2</a>    |
| PLAUR    | <a href="#">NM_001005376.1</a> |
| PML      | <a href="#">NM_002675.3</a>    |
| POU2F2   | <a href="#">NM_002698.2</a>    |
| PPARG    | <a href="#">NM_015869.3</a>    |

|                 |                                   |
|-----------------|-----------------------------------|
| PPBP            | <a href="#">NM_002704.2</a>       |
| PRDM1           | <a href="#">NM_001198.3</a>       |
| PRF1            | <a href="#">NM_005041.3</a>       |
| PRKCD           | <a href="#">NM_006254.3</a>       |
| PSMB10          | <a href="#">NM_002801.2</a>       |
| PSMB5           | <a href="#">NM_001130725.1</a>    |
| PSMB7           | <a href="#">NM_002799.2</a>       |
| PSMB8           | <a href="#">NM_004159.4</a>       |
| PSMB9           | <a href="#">NM_002800.4</a>       |
| PSMC2           | <a href="#">NM_002803.3</a>       |
| PSMD7           | <a href="#">NM_002811.3</a>       |
| PTAFR           | <a href="#">NM_000952.3</a>       |
| PTGER4          | <a href="#">NM_000958.2</a>       |
| PTGS2           | <a href="#">NM_000963.1</a>       |
| PTK2            | <a href="#">NM_005607.3</a>       |
| PTPN2           | <a href="#">NM_002828.2</a>       |
| PTPN22          | <a href="#">NM_015967.4</a>       |
| PTPN6           | <a href="#">NM_002831.5</a>       |
| PTPRC_all (comm | <a href="#">NM_080921.2</a>       |
| CD45R0          | <a href="#">NM_080921.3</a>       |
| CD45RA          | <a href="#">NM_002838.4</a>       |
| CD45RB          | <a href="#">ENST00000367367.1</a> |
| PYCARD          | <a href="#">NM_013258.3</a>       |
| RAF1            | <a href="#">NM_002880.2</a>       |
| RAG1            | <a href="#">NM_000448.2</a>       |
| RAG2            | <a href="#">NM_000536.3</a>       |
| RARRES3         | <a href="#">NM_004585.3</a>       |
| RELA            | <a href="#">NM_021975.2</a>       |
| RELB            | <a href="#">NM_006509.2</a>       |
| RORC            | <a href="#">NM_001001523.1</a>    |
| RUNX1           | <a href="#">NM_001754.4</a>       |
| S100A8          | <a href="#">NM_002964.3</a>       |
| S100A9          | <a href="#">NM_002965.2</a>       |
| S1PR1           | <a href="#">NM_001400.3</a>       |
| SELE            | <a href="#">NM_000450.2</a>       |
| SELL            | <a href="#">NR_029467.1</a>       |
| SELPLG          | <a href="#">NM_003006.3</a>       |
| SERPING1        | <a href="#">NM_000062.2</a>       |
| SH2D1A          | <a href="#">NM_001114937.2</a>    |
| SIGIRR          | <a href="#">NM_021805.2</a>       |
| SKI             | <a href="#">NM_003036.2</a>       |
| SLAMF1          | <a href="#">NM_003037.2</a>       |
| SLAMF6          | <a href="#">NM_001184714.1</a>    |
| SLAMF7          | <a href="#">NM_021181.3</a>       |
| SLC2A1          | <a href="#">NM_006516.2</a>       |
| SMAD3           | <a href="#">NM_005902.3</a>       |

|           |                                |
|-----------|--------------------------------|
| SMAD5     | <a href="#">NM_005903.5</a>    |
| SOCS1     | <a href="#">NM_003745.1</a>    |
| SOCS3     | <a href="#">NM_003955.3</a>    |
| SPP1      | <a href="#">NM_000582.2</a>    |
| SRC       | <a href="#">NM_005417.3</a>    |
| STAT1     | <a href="#">NM_007315.2</a>    |
| STAT2     | <a href="#">NM_005419.2</a>    |
| STAT3     | <a href="#">NM_139276.2</a>    |
| STAT4     | <a href="#">NM_003151.2</a>    |
| STAT5A    | <a href="#">NM_003152.2</a>    |
| STAT5B    | <a href="#">NM_012448.3</a>    |
| STAT6     | <a href="#">NM_003153.3</a>    |
| SYK       | <a href="#">NM_003177.3</a>    |
| TAGAP     | <a href="#">NM_054114.3</a>    |
| TAL1      | <a href="#">NM_003189.2</a>    |
| TAP1      | <a href="#">NM_000593.5</a>    |
| TAP2      | <a href="#">NM_000544.3</a>    |
| TAPBP     | <a href="#">NM_003190.4</a>    |
| TBK1      | <a href="#">NM_013254.2</a>    |
| TBX21     | <a href="#">NM_013351.1</a>    |
| TCF4      | <a href="#">NM_003199.1</a>    |
| TCF7      | <a href="#">NM_003202.2</a>    |
| TFRC      | <a href="#">NM_003234.1</a>    |
| TGFB1     | <a href="#">NM_000660.3</a>    |
| TGFBI     | <a href="#">NM_000358.2</a>    |
| TGFBR1    | <a href="#">NM_004612.2</a>    |
| TGFBR2    | <a href="#">NM_001024847.1</a> |
| THY1      | <a href="#">NM_006288.2</a>    |
| TICAM1    | <a href="#">NM_014261.1</a>    |
| TIGIT     | <a href="#">NM_173799.2</a>    |
| TIRAP     | <a href="#">NM_148910.2</a>    |
| TLR1      | <a href="#">NM_003263.3</a>    |
| TLR2      | <a href="#">NM_003264.3</a>    |
| TLR3      | <a href="#">NM_003265.2</a>    |
| TLR4      | <a href="#">NM_138554.2</a>    |
| TLR5      | <a href="#">NM_003268.3</a>    |
| TLR7      | <a href="#">NM_016562.3</a>    |
| TLR8      | <a href="#">NM_016610.2</a>    |
| TLR9      | <a href="#">NM_017442.2</a>    |
| TMEM173   | <a href="#">NM_198282.1</a>    |
| TNF       | <a href="#">NM_000594.2</a>    |
| TNFAIP3   | <a href="#">NM_006290.2</a>    |
| TNFAIP6   | <a href="#">NM_007115.2</a>    |
| TNFRSF10C | <a href="#">NM_003841.3</a>    |
| TNFRSF11A | <a href="#">NM_003839.2</a>    |
| TNFRSF13B | <a href="#">NM_012452.2</a>    |

|           |                                |
|-----------|--------------------------------|
| TNFRSF13C | <a href="#">NM_052945.3</a>    |
| TNFRSF14  | <a href="#">NM_003820.2</a>    |
| TNFRSF17  | <a href="#">NM_001192.2</a>    |
| TNFRSF1B  | <a href="#">NM_001066.2</a>    |
| TNFRSF4   | <a href="#">NM_003327.2</a>    |
| TNFRSF8   | <a href="#">NM_152942.2</a>    |
| TNFRSF9   | <a href="#">NM_001561.4</a>    |
| TNFSF10   | <a href="#">NM_003810.2</a>    |
| TNFSF11   | <a href="#">NM_003701.2</a>    |
| TNFSF12   | <a href="#">NM_003809.2</a>    |
| TNFSF13B  | <a href="#">NM_006573.4</a>    |
| TNFSF15   | <a href="#">NM_001204344.1</a> |
| TNFSF4    | <a href="#">NM_003326.2</a>    |
| TNFSF8    | <a href="#">NM_001244.3</a>    |
| TOLLIP    | <a href="#">NM_019009.2</a>    |
| TP53      | <a href="#">NM_000546.2</a>    |
| TRAF1     | <a href="#">NM_005658.3</a>    |
| TRAF2     | <a href="#">NM_021138.3</a>    |
| TRAF3     | <a href="#">NM_145725.1</a>    |
| TRAF4     | <a href="#">NM_004295.2</a>    |
| TRAF5     | <a href="#">NM_004619.3</a>    |
| TRAF6     | <a href="#">NM_145803.1</a>    |
| TYK2      | <a href="#">NM_003331.3</a>    |
| UBE2L3    | <a href="#">NM_198157.1</a>    |
| VCAM1     | <a href="#">NM_001078.3</a>    |
| VTN       | <a href="#">NM_000638.3</a>    |
| XBP1      | <a href="#">NM_005080.2</a>    |
| XCL1      | <a href="#">NM_002995.1</a>    |
| XCR1      | <a href="#">NM_005283.2</a>    |
| ZAP70     | <a href="#">NM_001079.3</a>    |
| ZBTB16    | <a href="#">NM_006006.4</a>    |
| ZEB1      | <a href="#">NM_001128128.1</a> |

#### **Internal Reference Genes**

---

|        |                                |
|--------|--------------------------------|
| ABCF1  | <a href="#">NM_001090.2</a>    |
| ALAS1  | <a href="#">NM_000688.4</a>    |
| EEF1G  | <a href="#">NM_001404.4</a>    |
| G6PD   | <a href="#">NM_000402.2</a>    |
| GAPDH  | <a href="#">NM_002046.3</a>    |
| GUSB   | <a href="#">NM_000181.1</a>    |
| HPRT1  | <a href="#">NM_000194.1</a>    |
| OAZ1   | <a href="#">NM_004152.2</a>    |
| POLR1B | <a href="#">NM_019014.3</a>    |
| POLR2A | <a href="#">NM_000937.2</a>    |
| PPIA   | <a href="#">NM_021130.2</a>    |
| SDHA   | <a href="#">NM_004168.1</a>    |
| TBP    | <a href="#">NM_001172085.1</a> |

TUBB [NM\\_178014.2](#)

RPL19 [NM\\_000981.3](#)

**Custom code set probes**

---

| <b>Official Symbol</b> | <b>Accession</b> |
|------------------------|------------------|
| SIGLEC1                | NM_023068.3      |
| BLK                    | NM_001715.2      |
| VH4-34 (9G4)           | AY058025.1       |
| PARP9                  | NM_031458.2      |
| BANK1                  | NM_017935.4      |
| TNFRSF13C              | NM_052945.3      |
| NRP4                   | NM_003873.5      |
| IRF9                   | NM_006084.4      |
| TNFSF10 (TRAIL)        | NM_003810.3      |
| HAVCR1                 | NM_012206.3      |
| RASGRP3                | NM_001139488.1   |
| SKAP2                  | NM_003930.4      |
| BACH2                  | NM_021813.3      |
| PTPN11                 | NM_002834.3      |
| PLCG1                  | NM_002660.2      |
| CD300a                 | NM_007261.3      |
| NCR2                   | NM_004828.3      |
| PLXNA1                 | NM_032242.3      |
| TYROBP                 | NM_003332.3      |
| S1PR4                  | NM_003775.3      |
