# Supplementary material for: Plasmacytoid dendritic cells and RNA-containing immune complexes drive expansion of peripheral B cell subsets with an SLE-like phenotype
Source: PubMed Central journal article supplement (PMC5573130; doi:10.1371/journal.pone.0183946), 2017-08-28
Supplement: pone.0183946.s006.pdf [file pone.0183946.s006.pdf]

**Supplementary Table S2**

Median values (n=10) of gene counts (nCounter)

| Gene      | Median value      | Median value      |
|-----------|-------------------|-------------------|
| name      | CD27-IgD- B cells | CD27+IgD- B cells |
| CD74      | 35908,9           | 34650,1           |
| HLA-B     | 18297,4           | 18033,0           |
| B2M       | 16931,7           | 20686,9           |
| HLA-A     | 12308,1           | 11375,5           |
| MX1       | 9600,5            | 11776,7           |
| HLA-DRA   | 8924,1            | 11051,0           |
| IFITM1    | 6695,0            | 7798,4            |
| HLA-C     | 6478,2            | 4597,9            |
| HLA-DRB3  | 4736,5            | 4589,6            |
| CXCR4     | 4326,2            | 3087,0            |
| MS4A1     | 3898,4            | 5551,7            |
| STAT1     | 3788,6            | 4110,8            |
| STAT2     | 3450,5            | 3015,5            |
| CD79A     | 3401,4            | 3681,8            |
| HLA-DPA1  | 3210,3            | 4203,3            |
| BANK1     | 2955,3            | 4871,9            |
| STAT6     | 2931,6            | 2802,5            |
| PTPRC_all | 2657,3            | 3593,7            |
| IRF7      | 2536,8            | 2590,6            |
| CD83      | 2280,5            | 1161,3            |
| IFIT2     | 2254,5            | 2853,5            |
| CCL4      | 2176,5            | 522,3             |
| CD48      | 2168,9            | 2198,0            |
| PML       | 2083,6            | 1962,7            |
| ARHGDIB   | 1981,5            | 2340,3            |
| IFI16     | 1953,7            | 2227,0            |
| TNFSF10   | 1897,6            | 1892,0            |
| HLA-DPB1  | 1778,6            | 2361,9            |
| CCR7      | 1750,6            | 1016,4            |
| MCL1      | 1732,7            | 2299,3            |
| PSMB9     | 1728,4            | 1900,4            |
| CD79B     | 1710,8            | 2131,3            |
| CD53      | 1695,0            | 2497,6            |
| PARP9     | 1523,7            | 1734,0            |
| CD19      | 1485,8            | 1887,0            |
| IRF8      | 1400,9            | 1017,7            |
| SELL      | 1367,4            | 1526,7            |
| TNFRSF13C | 1319,7            | 2084,4            |
| PSMB8     | 1240,7            | 1331,5            |
| TAP1      | 1217,9            | 1263,0            |

|           |        |        |
|-----------|--------|--------|
| ILF3      | 1184,8 | 1143,3 |
| IL2RG     | 1181,2 | 1083,5 |
| HLA-DMB   | 1124,7 | 1315,4 |
| BTLA      | 1120,4 | 589,6  |
| IL32      | 1099,8 | 1233,4 |
| BCL2      | 1089,7 | 1025,6 |
| CD22      | 1081,4 | 1174,2 |
| IRF9      | 1069,3 | 1083,5 |
| JAK2      | 1039,7 | 1007,0 |
| TGFBR2    | 1038,6 | 834,9  |
| BAX       | 1015,8 | 951,5  |
| PSMB10    | 1009,5 | 964,1  |
| IRF4      | 952,6  | 661,3  |
| RASGRP3   | 929,9  | 867,1  |
| HLA-DMA   | 923,3  | 961,1  |
| CD45RA    | 920,5  | 1627,8 |
| MAP4K4    | 910,5  | 800,0  |
| CTSS      | 879,2  | 1038,2 |
| PTPN6     | 869,1  | 753,0  |
| TAP2      | 854,8  | 781,2  |
| TAPBP     | 830,1  | 975,4  |
| IFIH1     | 825,2  | 827,8  |
| NFKB2     | 811,3  | 507,3  |
| CD81      | 792,9  | 945,3  |
| IRF1      | 786,1  | 785,2  |
| CTNNB1    | 755,9  | 784,4  |
| JAK1      | 754,7  | 916,6  |
| MIF       | 753,1  | 569,1  |
| HLA-DQA1  | 739,7  | 899,0  |
| STAT3     | 730,2  | 805,7  |
| GBP1      | 717,7  | 651,9  |
| MYD88     | 706,4  | 772,9  |
| TGFB1     | 706,0  | 727,6  |
| CD44      | 695,7  | 922,1  |
| SOCS1     | 674,8  | 764,8  |
| PTPN1     | 673,5  | 971,4  |
| IKZF3     | 668,8  | 1484,0 |
| NFKBIA    | 657,6  | 439,6  |
| PAX5      | 646,5  | 649,8  |
| TP53      | 628,3  | 563,3  |
| TCF4      | 612,7  | 929,1  |
| C14orf166 | 607,6  | 557,0  |
| CD40      | 598,8  | 620,8  |
| ITGA4     | 588,6  | 538,7  |
| VH4-34    | 586,7  | 228,6  |
| IFI35     | 579,0  | 528,7  |

|          |       |        |
|----------|-------|--------|
| IL16     | 536,0 | 643,0  |
| BST2     | 529,7 | 639,4  |
| POU2F2   | 523,3 | 701,2  |
| GPI      | 513,4 | 352,0  |
| CD24     | 510,8 | 1503,4 |
| MAPK1    | 501,9 | 497,9  |
| IL4R     | 500,9 | 105,4  |
| C1QBP    | 500,8 | 436,0  |
| HLA-DOB  | 498,5 | 723,3  |
| CD164    | 478,3 | 432,2  |
| BLNK     | 477,7 | 504,0  |
| BLK      | 467,8 | 786,3  |
| NOTCH2   | 465,1 | 458,7  |
| CD46     | 449,9 | 492,6  |
| LAMP3    | 449,7 | 224,0  |
| ICAM3    | 430,5 | 573,6  |
| SLAMF1   | 428,2 | 200,4  |
| FCGR2B   | 425,3 | 673,8  |
| CASP8    | 412,4 | 487,4  |
| TLR7     | 411,8 | 389,6  |
| IFNAR2   | 409,8 | 457,7  |
| MALT1    | 403,0 | 355,4  |
| ETS1     | 400,4 | 513,3  |
| IL10RA   | 400,3 | 685,3  |
| CD99     | 395,9 | 466,8  |
| LITAF    | 395,5 | 271,6  |
| SMAD3    | 385,6 | 258,4  |
| BCL10    | 384,4 | 415,0  |
| SKAP2    | 373,6 | 499,5  |
| SYK      | 372,3 | 579,2  |
| IKZF2    | 367,1 | 36,9   |
| MAP4K2   | 360,4 | 372,5  |
| TAGAP    | 359,5 | 417,6  |
| RELA     | 358,3 | 326,3  |
| CASP2    | 345,3 | 342,2  |
| MAPKAPK2 | 344,5 | 323,5  |
| BCAP31   | 343,5 | 341,9  |
| BTK      | 341,9 | 375,1  |
| TBK1     | 341,4 | 417,2  |
| PSMD7    | 331,3 | 309,5  |
| IRAK1    | 318,5 | 283,3  |
| CCR6     | 317,6 | 424,1  |
| PSMB7    | 311,1 | 272,7  |
| PTPN11   | 310,1 | 284,5  |
| MAPK14   | 305,4 | 248,1  |
| PTPN2    | 291,6 | 345,7  |

|          |       |       |
|----------|-------|-------|
| MAP4K1   | 277,3 | 460,8 |
| TNFSF13B | 274,7 | 240,9 |
| CD97     | 273,5 | 291,9 |
| NFATC1   | 268,5 | 221,2 |
| IRF5     | 266,8 | 242,3 |
| S1PR1    | 265,8 | 270,5 |
| NFATC3   | 265,3 | 209,7 |
| TRAF4    | 265,0 | 244,8 |
| LAG3     | 264,1 | 216,4 |
| IFNGR1   | 263,6 | 264,5 |
| CCL22    | 263,2 | 144,0 |
| TNFAIP3  | 262,6 | 190,7 |
| CYBB     | 256,6 | 360,3 |
| BACH2    | 256,3 | 157,2 |
| IL6ST    | 252,6 | 181,9 |
| CCND3    | 252,3 | 149,6 |
| TLR1     | 250,9 | 330,8 |
| ICAM2    | 249,2 | 111,6 |
| PSMB5    | 248,1 | 196,6 |
| CXCL10   | 247,9 | 216,5 |
| NCF4     | 246,0 | 455,5 |
| GBP5     | 244,3 | 248,4 |
| TYK2     | 243,6 | 272,3 |
| CCL3     | 243,1 | 106,9 |
| IL13RA1  | 238,9 | 143,0 |
| LTA      | 237,4 | 171,3 |
| TRAF5    | 235,8 | 393,8 |
| PRKCD    | 232,7 | 341,4 |
| CD59     | 229,2 | 226,9 |
| TRAF2    | 228,5 | 224,0 |
| PECAM1   | 227,6 | 315,7 |
| JAK3     | 221,1 | 284,3 |
| NFATC2   | 219,6 | 286,4 |
| CHUK     | 215,7 | 199,1 |
| CD58     | 214,2 | 225,8 |
| TNF      | 211,3 | 283,8 |
| PDCD2    | 207,5 | 188,7 |
| IKBKB    | 205,0 | 228,7 |
| TNFRSF14 | 201,3 | 211,8 |
| TRAF3    | 200,0 | 267,7 |
| TFRC     | 197,3 | 247,5 |
| NFKB1    | 190,9 | 125,1 |
| RAF1     | 184,6 | 232,5 |
| HLA-DQB1 | 179,1 | 194,7 |
| LILRB1   | 176,5 | 165,1 |
| IKBKG    | 176,2 | 170,0 |

|           |       |       |
|-----------|-------|-------|
| CIITA     | 175,9 | 188,8 |
| GPR183    | 175,6 | 571,2 |
| CASP1     | 175,6 | 290,8 |
| ITGB1     | 174,5 | 487,7 |
| STAT5A    | 172,7 | 168,6 |
| NFKBIZ    | 172,0 | 261,4 |
| BCL3      | 166,1 | 206,9 |
| CUL9      | 165,2 | 190,6 |
| IRAK4     | 164,7 | 188,9 |
| TRAF1     | 163,0 | 104,8 |
| TNFRSF17  | 162,9 | 188,5 |
| PTK2      | 161,6 | 193,0 |
| IL21R     | 154,7 | 33,4  |
| ENTPD1    | 153,8 | 160,4 |
| FYN       | 153,6 | 153,3 |
| CD45RB    | 152,1 | 82,3  |
| CTSC      | 151,6 | 179,1 |
| ITGB2     | 151,2 | 98,9  |
| STAT5B    | 147,8 | 219,1 |
| LCK       | 146,9 | 143,7 |
| IGF2R     | 142,4 | 110,9 |
| APP       | 142,3 | 105,3 |
| ICOSLG    | 142,0 | 59,0  |
| PSMC2     | 141,4 | 157,9 |
| NT5E      | 141,4 | 89,9  |
| IKBKE     | 141,2 | 238,6 |
| ITGAE     | 141,1 | 109,4 |
| TICAM1    | 138,8 | 154,2 |
| NOD1      | 136,4 | 141,4 |
| STAT4     | 134,3 | 99,5  |
| CASP3     | 131,4 | 104,3 |
| TNFRSF1B  | 130,5 | 165,5 |
| BCL6      | 127,9 | 101,1 |
| CD70      | 127,0 | 262,8 |
| IRF3      | 126,7 | 141,6 |
| TRAF6     | 126,7 | 121,9 |
| TGFBR1    | 125,3 | 139,6 |
| BATF3     | 124,8 | 56,8  |
| FKBP5     | 124,3 | 125,0 |
| TNFRSF13B | 122,8 | 832,9 |
| XBP1      | 119,8 | 205,7 |
| IL15      | 119,7 | 116,5 |
| TLR9      | 117,6 | 279,0 |
| ZEB1      | 116,7 | 157,1 |
| IKZF1     | 114,2 | 167,6 |
| ATG16L1   | 113,2 | 109,9 |

|         |       |       |
|---------|-------|-------|
| IL12RB1 | 110,6 | 122,4 |
| TOLLIP  | 110,4 | 111,9 |
| ITGAL   | 109,1 | 193,4 |
| RELB    | 101,5 | 87,3  |
| ATG5    | 100,8 | 121,6 |
| BCL2L11 | 100,3 | 93,0  |
| SKI     | 97,7  | 132,5 |
| UBE2L3  | 96,1  | 99,4  |
| RARRES3 | 94,8  | 80,6  |
| PTGER4  | 93,0  | 65,6  |
| PLCG1   | 92,8  | 136,2 |
| THADA   | 92,0  | 106,1 |
| SLAMF6  | 90,9  | 65,6  |
| SLAMF7  | 90,6  | 121,3 |
| ATG7    | 87,8  | 97,4  |
| CSF2RB  | 85,1  | 133,5 |
| RUNX1   | 84,6  | 59,2  |
| ABCB1   | 82,6  | 30,2  |
| GZMB    | 81,6  | 27,5  |
| FCGRT   | 80,2  | 87,8  |
| BID     | 79,7  | 55,3  |
| CD96    | 79,5  | 52,7  |
| SMAD5   | 79,4  | 96,0  |
| S1PR4   | 79,4  | 99,6  |
| ABL1    | 78,3  | 82,1  |
| TNFSF12 | 76,6  | 112,8 |
| NOTCH1  | 74,9  | 77,9  |
| CD82    | 68,7  | 129,9 |
| SRC     | 68,6  | 86,0  |
| MBP     | 68,0  | 98,6  |
| CD274   | 66,6  | 65,9  |
| BATF    | 65,9  | 96,0  |
| LAIR1   | 64,2  | 33,9  |
| CD80    | 60,7  | 127,6 |
| AHR     | 59,9  | 78,7  |
| IKBKAP  | 59,6  | 51,3  |
| LCP2    | 57,9  | 49,7  |
| ATG12   | 56,4  | 51,5  |
| CDKN1A  | 55,3  | 58,5  |
| TCF7    | 55,2  | 178,8 |
| LY96    | 55,0  | 91,4  |
| TBX21   | 54,8  | 69,3  |
| CXCR3   | 53,4  | 108,2 |
| NOD2    | 52,9  | 74,8  |
| PYCARD  | 52,8  | 85,4  |
| ICAM1   | 52,5  | 56,5  |

|          |      |       |
|----------|------|-------|
| CD86     | 52,0 | 95,6  |
| ATG10    | 50,5 | 48,6  |
| EGR1     | 50,3 | 62,8  |
| IRAK2    | 48,8 | 60,0  |
| MR1      | 44,3 | 55,6  |
| SIGIRR   | 43,9 | 53,9  |
| ADA      | 41,3 | 92,0  |
| IDO1     | 40,9 | 60,7  |
| CCR1     | 38,4 | 119,1 |
| CD300a   | 35,8 | 80,9  |
| PRDM1    | 32,9 | 90,2  |
| IL2RB    | 28,0 | 51,7  |
| CEACAM1  | 27,8 | 55,2  |
| CD6      | 27,2 | 51,2  |
| IL2RA    | 21,0 | 87,3  |
| FCGR2A/C | 20,8 | 106,1 |
| CD27     | 18,4 | 688,0 |
| HLA-DRB1 | 8,9  | 153,7 |
